# Supplementary material for: Periostin and Epithelial–Mesenchymal Transition Score as Novel Prognostic Markers for Leiomyosarcoma, Myxofibrosarcoma, and Undifferentiated Pleomorphic Sarcoma
Source: Oxford University Press journal article supplement (doi:10.1158/1078-0432.ccr-19-2297), 2020-03-03
Supplement: 10780432ccr192297-sup-225497_3_supp_6120082_q6b2q6.pdf [file 10780432ccr192297-sup-225497_3_supp_6120082_q6b2q6.pdf]

**Table S4.** Clinical and pathological characteristics of the 67 STS patients analyzed for circulating levels of periostin

| Variable                |       | Patients<br>N (%) | Histotype  |            |            |
|-------------------------|-------|-------------------|------------|------------|------------|
|                         |       |                   | LMS        | MFS        | UPS        |
| Age (years)             | ≤70   | 39 (58.2%)        | 21 (70.0%) | 12 (52.2%) | 6 (42.9%)  |
|                         | >70   | 28 (41.8%)        | 9 (30.0%)  | 11 (47.8%) | 8 (57.1%)  |
| Gender                  | M     | 36 (53.7%)        | 14 (46.7%) | 15 (65.2%) | 7 (50.0%)  |
|                         | F     | 31 (46.3%)        | 16 (53.3%) | 8 (34.8%)  | 7 (50.0%)  |
| Grade                   | G1+G2 | 23 (34.3%)        | 11 (36.7%) | 11 (47.8%) | 1 (7.1%)   |
|                         | G3    | 44 (65.7%)        | 19 (63.3%) | 12 (52.2%) | 13 (92.9%) |
| Tumor size              | ≤5 cm | 12 (17.9%)        | 9 (30.0%)  | 1 (4.4%)   | 2 (14.3%)  |
|                         | >5 cm | 55 (82.1%)        | 21 (70.0%) | 22 (95.6%) | 12 (85.7%) |
| Metastasis at diagnosis | Yes   | 7 (10.5%)         | 7 (23.3%)  | 0          | 0          |
|                         | No    | 60 (89.5%)        | 23 (76.7%) | 23         | 14         |
| Survival status         | Alive | 30 (44.8%)        | 10 (33.3%) | 16 (69.6%) | 4 (28.6%)  |
|                         | Dead  | 37 (55.2%)        | 20 (66.7%) | 7 (30.4%)  | 10 (71.4%) |
| Histotype               | LMS   | 30 (44.8%)        |            |            |            |
|                         | MFS   | 23 (34.3%)        |            |            |            |
|                         | UPS   | 14 (20.9%)        |            |            |            |

Abbreviations: LMS, leiomyosarcoma; MFS, myxofibrosarcoma; UPS, undifferentiated pleomorphic sarcoma.
